# Supplementary material
Source: ML conference proceedings conference paper supplement (https://www.ecva.net/papers/eccv_2020/papers_ECCV/html/123550511_ECCV_2020_paper.php)
Supplement: Supplementary file 1 [file 123550511-supp.pdf]

# Supplementary Materials of Consistency-based Semi-supervised Active Learning: Towards Minimizing Labeling Cost

Mingfei Gao<sup>1\*</sup>, Zizhao Zhang<sup>2</sup>, Guo Yu<sup>3</sup>, Sercan Ö. Arık<sup>2</sup>,  
Larry S. Davis<sup>1</sup>, and Tomas Pfister<sup>2</sup>

<sup>1</sup>University of Maryland <sup>2</sup>Google Cloud AI <sup>3</sup>University of Washington

## 1 Proof of Proposition

*Proof.* Denote  $\mathcal{X}$  as the feature space and  $\{1, \dots, J\}$  as the label space. Note that by Baye's formula and the law of total probability, we have

$$\begin{aligned}
R_H[p(\hat{Y}|X)] &= \mathbb{E}_X \left\{ H \left[ p(Y|X), p(\hat{Y}|X) \right] \right\} \\
&= - \sum_{x \in \mathcal{X}} \sum_{y=1}^J p(Y = y|X = x) \log p(\hat{Y} = y|X = x) p(X = x) \\
&= - \sum_{y=1}^J \sum_{x \in \mathcal{X}} p(X = x, Y = y) \log \left[ \frac{p(\hat{Y} = y)p(X = x|\hat{Y} = y)}{p(X = x)} \right] \\
&= - \sum_{y=1}^J \sum_{x \in \mathcal{X}} p(X = x, Y = y) \log p(\hat{Y} = y) \\
&\quad - \sum_{y=1}^J \sum_{x \in \mathcal{X}} p(X = x, Y = y) \log \left[ \frac{p(X = x|\hat{Y} = y)}{p(X = x)} \right] \\
&= - \sum_{y=1}^J p(Y = y) \log p(\hat{Y} = y) - \sum_{x \in \mathcal{X}} \sum_{y=1}^J p(X = x, Y = y) \log \left[ p(X = x|\hat{Y} = y) \right] \\
&\quad + \sum_{x \in \mathcal{X}} \sum_{y=1}^J p(X = x, Y = y) \log [p(X = x)] \\
&= H \left[ p(Y), p(\hat{Y}) \right] + \sum_{x \in \mathcal{X}} p(X = x) \log [p(X = x)] \\
&\quad - \sum_{x \in \mathcal{X}} \sum_{y=1}^J p(X = x, Y = y) \log \left[ p(X = x|\hat{Y} = y) \right]
\end{aligned}$$

---

\* Work done while the author was an intern at Google; now at Salesforce Research.  
Email: mgao@cs.umd.edu

$$= H \left[ p(Y), p(\hat{Y}) \right] - H \left[ p(X) \right] - \sum_{x \in \mathcal{X}} \sum_{y=1}^J p(X = x, Y = y) \log \left[ p(X = x | \hat{Y} = y) \right]. \quad (1)$$

We first give a lower bound. Note that  $p(X = x | \hat{Y} = y) \leq 1$  for any  $(x, y) \in \mathcal{X} \times [J]$ , so Eq. 1 implies that

$$\mathbb{E}_X \left\{ H \left[ p(Y|X), p(\hat{Y}|X) \right] \right\} \geq H \left[ p(Y), p(\hat{Y}) \right] - H \left[ p(X) \right].$$

To prove the upper bound, denote  $\min_{(x,y) \in \mathcal{X} \times [J]} p(X = x | \hat{Y} = y) = \hat{Z} \in (0, 1)$  where  $(x, y) \in \mathcal{X} \times [J]$ . Then from Eq. 1

$$\begin{aligned} \mathbb{E}_X \left\{ H \left[ p(Y|X), p(\hat{Y}|X) \right] \right\} &\leq H \left[ p(Y), p(\hat{Y}) \right] \\ &\quad - H \left[ p(X) \right] - \log \hat{Z} \sum_{x \in \mathcal{X}} \sum_{y=1}^J p(X = x, Y = y) \\ &= H \left[ p(Y), p(\hat{Y}) \right] - H \left[ p(X) \right] - \log \hat{Z}. \end{aligned}$$

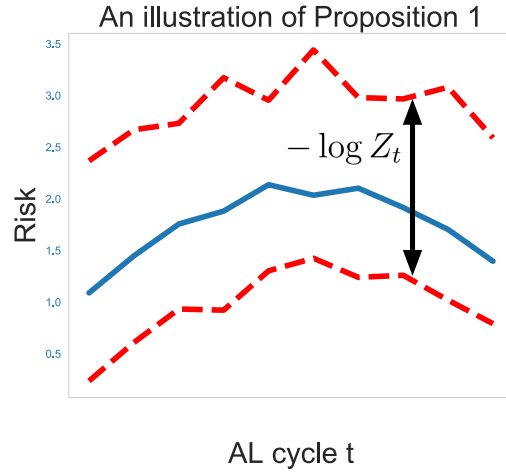

**Fig. A1.** An illustration of Proposition: the blue curve represents the (expected) cross-entropy, and the two red curves are the lower and upper bounds. The value  $-\log \hat{Z}_t$  characterizes the range of the bounds.

## 2 Consistency-based Selection with Other SSL methods

To investigate the effectiveness of our method, we combine our selection method with two more SSL methods, *i.e.*, Pi-Model [1] and VAT [2]. We consider Pi-

**Table A1.** Comparison between our method and k-center trained with different SSL methods on CIFAR-10. The reported results are averaged over 3 trials

| Methods     | Selection   | # of labeled samples in total |                   |                   |                   |            |
|-------------|-------------|-------------------------------|-------------------|-------------------|-------------------|------------|
|             |             | 1000                          | 1500              | 2000              | 2500              | 3000       |
| Pi-Model[1] | k-center    | 67.82±1.34                    | 71.72±0.39        | 74.56±0.36        | 75.98±0.53        | 77.7±0.32  |
|             | <b>Ours</b> | <b>72.06±0.30</b>             | <b>74.96±0.20</b> | <b>77.05±0.50</b> | <b>78.64±0.48</b> |            |
| VAT[2]      | k-center    | 80.52±0.32                    | 82.71±0.46        | 84.51±0.25        | 86.03±0.08        | 86.61±0.19 |
|             | <b>Ours</b> | <b>85.22±0.20</b>             | <b>87.05±0.25</b> | <b>88.32±0.19</b> | <b>89.1±0.13</b>  |            |

Model and VAT, since they use consistency-related regularization which matches our assumption. The experiments are conducted against our strongest baseline, k-center, on CIFAR-10. All models start from 1000 labels to avoid cold start problems. We follow the experimental setting of CIFAR-10 in our main paper. In each AL cycle, the model is initialized with the model trained in the previous cycle. We use the implementation of these SSL methods provided by MixMatch<sup>1</sup>. As shown in Table A1, our consistency-based selection works consistently better than k-center with these SSL methods.

<sup>1</sup> <https://github.com/google-research/mixmatch>

## References

1. Laine, S., Aila, T.: Temporal ensembling for semi-supervised learning. ICLR (2017)
2. Miyato, T., Maeda, S.i., Koyama, M., Ishii, S.: Virtual adversarial training: a regularization method for supervised and semi-supervised learning. TPAMI (2018)
